# Supplementary material for: Layer number dependent exciton dissociation and carrier recombination in 2D Ruddlesden–Popper halide perovskites
Source: Royal Society of Chemistry journal article supplement (doi:10.1039/d1tc01656c), 2021-01-01
Supplement: d1tc01656c1.pdf [file d1tc01656c1.pdf]

## Supporting information

# The number of layers dependent exciton dissociation and carrier recombination in 2D Ruddlesden-Popper halide perovskites

*Junlin Lu<sup>1,2,+</sup>, Weijian Chen<sup>1,3,+</sup>, Chunhua Zhou<sup>1</sup>, Shuang Yang<sup>4</sup>, Chong Wang<sup>5</sup>, Rongfei*

*Wang<sup>5</sup>, Xin Wang<sup>2</sup>, Zhixing Gan<sup>6,7</sup>, , Baohua Jia<sup>1\*</sup> and Xiaoming Wen<sup>1\*</sup>*

1: Centre for Translational Atomaterials, Swinburne University of Technology, Hawthorn 3122, Australia

2: South China Academy of Advanced Optoelectronics & International Academy of Optoelectronics at Zhaoqing, South China Normal University, Guangdong, 510631, PR China

3: Australian Centre for Advanced Photovoltaics, School of Photovoltaic and Renewable Energy Engineering, University of New South Wales (UNSW), Kensington, NSW 2052 Australia

4. Key Laboratory for Ultrafine Materials of Ministry of Education, Shanghai Engineering Research Center of Hierarchical Nanomaterials, School of Materials Science and Engineering, East China University of Science and Technology, Shanghai 200237, China

5: School of Materials and Energy, Yunnan University, Kunming 650091, P. R. China

6. Center for Future Optoelectronic Functional Materials, School of Computer and Electronic Information/School of Artificial Intelligence, Nanjing Normal University, Nanjing 210023, P. R. China

7. College of Materials Science and Engineering, Qingdao University of Science and Technology, Qingdao 266042, P. R. China

## Material synthesis

The synthesis of  $BA_2(MA)_{n-1}Pb_nI_{3n+1}$  single crystals is based on the method by Stoumpos et al.<sup>1</sup> with some modifications.

*Synthesis of 2D  $BA_2PbI_4$  Crystals:* Lead acetate ( $Pb(COO)_2$ ) powder (1.6g) was dissolved in 5 mL of 57% w/w aqueous hydroiodic acid (HI) solution at room temperature under constant magnetic stirring, which formed a bright yellow solution. Meanwhile, in another bottle,  $n\text{-CH}_3(\text{CH}_2)_3\text{NH}_2$  (0.9 mL) was slowly neutralized with 5 mL of HI 57% w/w in an ice bath. Then, the  $n\text{-CH}_3(\text{CH}_2)_3\text{NH}_3\text{I}$  solution was dropwise added to the lead solution under 100 °C and stirring, which initially produced a black precipitate, and subsequently dissolved under heating the combined solution to boiling. The stirring was then stopped, and the solution was left to cool to room temperature during which time orange plate shaped crystals can be obtained. The precipitation was deemed to be complete after about 2 h. The crystals were isolated by filtration and thoroughly dried under reduced pressure.

*Synthesis of 2D  $BA_2(MA)Pb_2I_7$  Crystals:* Lead acetate ( $Pb(COO)_2$ ) powder (1.6 g) was dissolved in 5 mL of 57% w/w aqueous hydroiodic acid (HI) solution at room temperature under constant magnetic stirring, which formed a bright yellow solution. Subsequent addition of solid  $\text{CH}_3\text{NH}_3\text{Cl}$  (169 mg) to the hot yellow solution initially caused the precipitation of a black powder, which rapidly redissolved under stirring to afford a clear bright yellow solution. Meanwhile, in another bottle,  $n\text{-CH}_3(\text{CH}_2)_3\text{NH}_2$  (0.35 mL) was slowly neutralized with 5 mL of HI 57% w/w in an ice bath. Then, the  $n\text{-CH}_3(\text{CH}_2)_3\text{NH}_3\text{I}$  solution was dropwise added to the lead solution under 100°C and stirring, which initially produced a black precipitate, and subsequently dissolved under heating the combined solution to boiling. The stirring was then stopped, and the solution was left to cool to room temperature, after which cherry-red plate-shaped crystals can be obtained. The precipitation was deemed to be complete after about 2 h. The crystals were isolated by filtration and thoroughly dried under reduced pressure.

*Synthesis of 2D  $BA_2(MA)_2Pb_3I_{10}$  Crystals:* Lead acetate ( $Pb(COO)_2$ ) powder (1.6 g) was dissolved in 5 mL of 57% w/w aqueous hydroiodic acid (HI) solution at room temperature under constant magnetic stirring, which formed a bright yellow solution. Subsequent addition of solid  $\text{CH}_3\text{NH}_3\text{Cl}$  (225 mg) to the hot yellow solution initially caused the precipitation of a black powder, which rapidly redissolved under stirring to afford a clear bright yellow solution. Meanwhile, in another bottle,  $n\text{-CH}_3(\text{CH}_2)_3\text{NH}_2$  (0.16 mL) was slowly neutralized with 5 mL

of HI 57% w/w in an ice bath. Then, the  $n\text{-CH}_3(\text{CH}_2)_3\text{NH}_3\text{I}$  solution was dropwise added to the lead solution under 100 °C and stirring, which initially produced a black precipitate, and subsequently dissolved under heating the combined solution to boiling. The stirring was then stopped, and the solution was left to cool to room temperature during which time deep-red plate shaped crystals can be obtained. The precipitation was deemed to be complete after about 2 h. The crystals were isolated by filtration and thoroughly dried under reduced pressure.

### **Sample fabrication (exfoliation)**

The samples used in this investigation include  $(\text{BA})_2\text{PbI}_4$ ,  $(\text{BA})_2(\text{MA})\text{Pb}_2\text{I}_7$ , and  $\text{BA}_2(\text{MA})_2\text{Pb}_3\text{I}_{10}$  Ruddlesden–Popper perovskites platelets. The 2D perovskite platelets were obtained by cleaving the bulk crystals using the well-known scotch-tape method<sup>2</sup> under the protection of nitrogen. Briefly, 2D perovskite bulk crystal adhered to the scotch-tape and then flakes of perovskite crystal were peeled off from the bulk repeatedly until the platelets are thin enough to attach strongly to the Si wafer with van der Waals forces. The exfoliated  $(\text{BA})_2\text{PbI}_4$ ,  $(\text{BA})_2(\text{MA})\text{Pb}_2\text{I}_7$  and  $\text{BA}_2(\text{MA})_2\text{Pb}_3\text{I}_{10}$  platelets was denoted as  $n=1$ ,  $n=2$  and  $n=3$  respectively.

### **Characterization**

Powder XRD pattern of the crystal was recorded on Bruker D8 diffractometer at a scanning rate of  $1^\circ \text{ min}^{-1}$ , using Cu K $\alpha$  radiation ( $\lambda = 1.5406 \text{ \AA}$ ).

### **Spectroscopic measurement**

For both room temperature and low temperature measurement, steady-state photoluminescence are detected by a spectrometer (Ocean Optics, QE-Pro), and time-resolved photoluminescence measurements were performed with a time-correlated single photon counting system (PicoHarp 300, PicoQuant GmbH). A 405 nm laser diode (pulse duration 40 ps, repetition rate 20 MHz) was used as the excitation source. The perovskites samples were placed in the chamber of a close-cycled helium cryostat for the low-temperature measurements. Femtosecond pump-probe TA experiments were performed on a TA spectrometer. The laser consisted of a Ti:sapphire mode-locked oscillator that seeded a regenerative amplifier. The output of the amplifier was centered at 800 nm with a repetition rate of 1 kHz and pulse duration

of 100 fs, which was then split into pump and probe beamlines. The 400 nm pump pulses were generated by second harmonic generation using a  $\beta$ -BaB<sub>2</sub>O<sub>4</sub> crystal. The probe beam passed through a mechanical delay stage and was used to generate a white light continuum in a 3.2 mm sapphire plate. The probe light was then detected by a polychromatic-charge coupled device. The TA measurements were performed at room temperature.

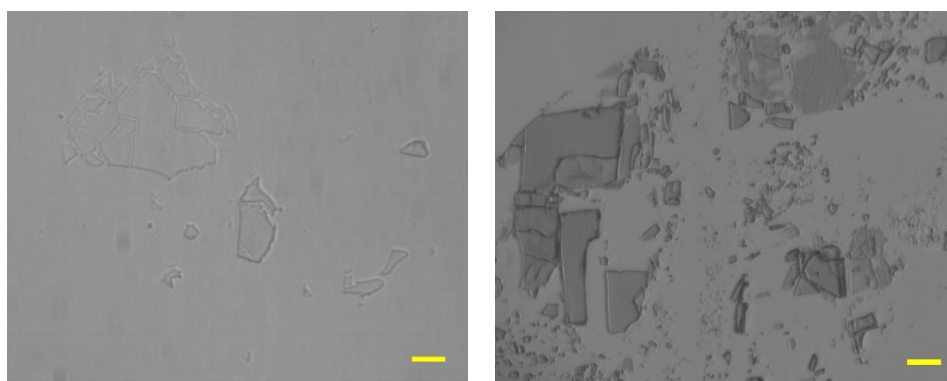

**Figure S1:** Typical microscopic photos for exfoliated 2D RP perovskite microplatelets (scale bar: 20  $\mu$ m)

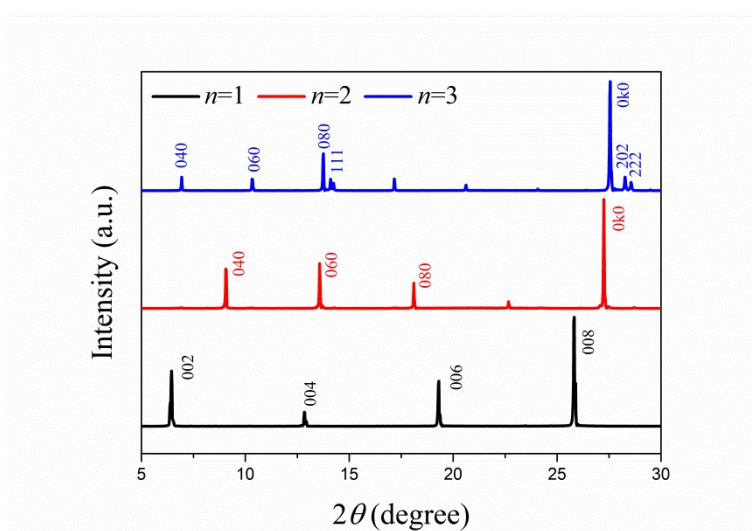

**Figure S2:** XRD pattern of BA<sub>2</sub>MA<sub>n-1</sub>Pb<sub>n</sub>I<sub>3n+1</sub> for n=1, 2, 3, respectively.

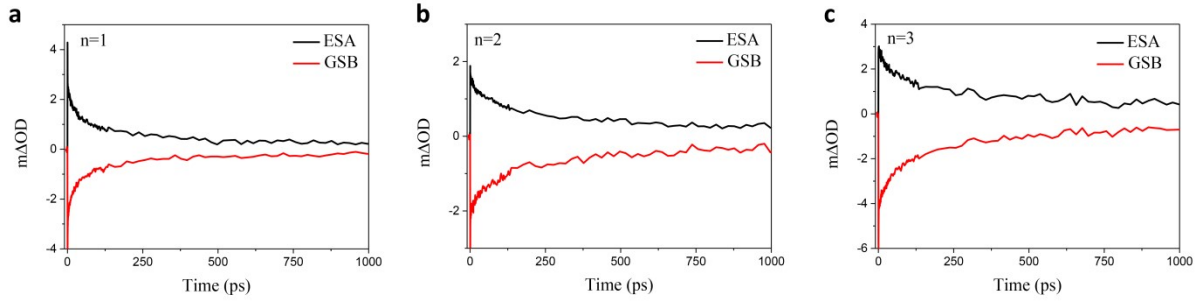

**Figure S3:** Transient absorption decay at ESA and GSB for (a)  $n=1$ , (b)  $n=2$  and (c)  $n=3$ .

**Table S1:** TA decay time at bandedge wavelength extracted from bi-exponential function fitting

|       |     | $\tau_1$ (ps) | $\tau_2$ (ps) | $\tau_{\text{eff}}$ (ps) |
|-------|-----|---------------|---------------|--------------------------|
| $n=1$ | ESA | 23.5          | 225.0         | 115.8                    |
|       | GSB | 12.0          | 117.6         | 67.0                     |
| $n=2$ | ESA | 15.1          | 202.2         | 139.0                    |
|       | GSB | 22.7          | 227.1         | 163.6                    |
| $n=3$ | ESA | 30.4          | 268.7         | 170.2                    |
|       | GSB | 31.5          | 367.6         | 224.0                    |

**Table S2:** Bi-exponential function fitting parameter for  $n=1$  at room and low temperature (20 K)

|                  | Intensity(mW/cm <sup>2</sup> ) | $\tau_1$ (ns) | $A_1$ | $\tau_2$ (ns) | $A_2$ |
|------------------|--------------------------------|---------------|-------|---------------|-------|
| Room temperature | 15                             | 0.53          | 0.76  | 1.94          | 0.10  |
|                  | 50                             | 0.50          | 0.64  | 2.08          | 0.11  |
|                  | 150                            | 0.51          | 0.54  | 3.74          | 0.09  |
|                  | 500                            | 0.52          | 0.46  | 3.78          | 0.13  |
| Low temperature  | 15                             | 0.67          | 0.53  | 1.71          | 0.31  |
|                  | 50                             | 0.69          | 0.53  | 1.92          | 0.27  |
|                  | 150                            | 0.63          | 0.83  | 2.13          | 0.25  |
|                  | 500                            | 0.52          | 0.65  | 2.05          | 0.16  |

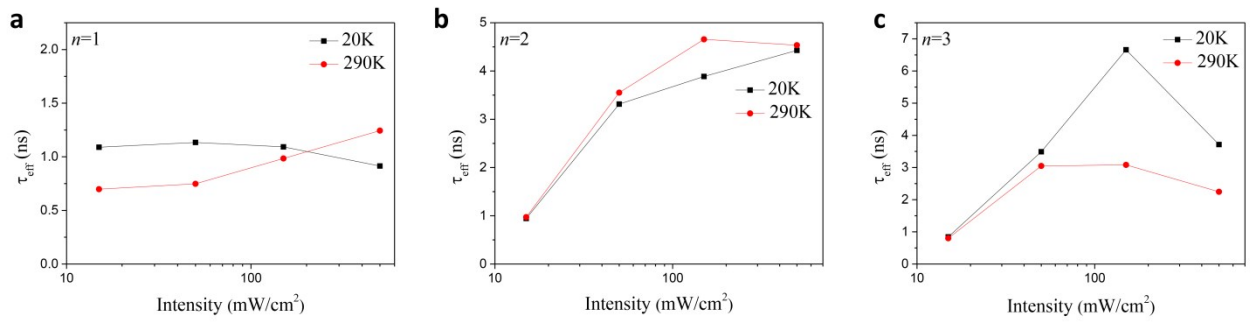

**Figure S4:** TRPL effective lifetime of  $n=1$ (a),  $n=2$  (b),  $n=3$ (c) at different temperatures

## References

1. Stoumpos, C. C.; Cao, D. H.; Clark, D. J.; Young, J.; Rondinelli, J. M.; Jang, J. I.; Hupp, J. T.; Kanatzidis, M. G. *Chem. Mater.* **2016**, *28* (8), 2852-2867.
2. Novoselov, K. S.; Geim, A. K.; Morozov, S. V.; Jiang, D.; Zhang, Y.; Dubonos, S. V.; Grigorieva, I. V.; Firsov, A. A. *Science* **2004**, *306* (5696), 666-669.
